# Supplementary material
Source: Springer Nature journal article supplement (https://www.springermedizin.de/resource/supplementary/12984_2012_496_MOESM3_ESM.pdf/9604722)

# Endpoint displacement amplitude ( $M \pm SD$ )

**A**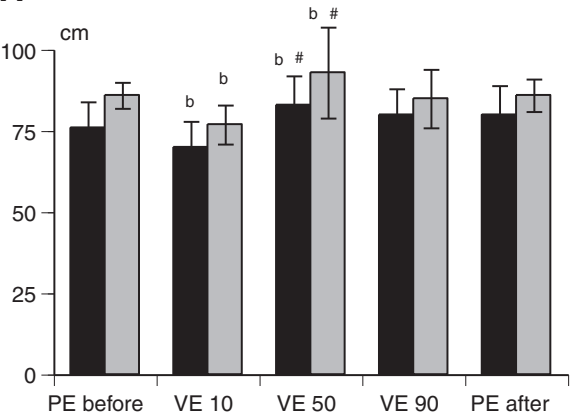

# COM displacement ( $M \pm SD$ )

**B**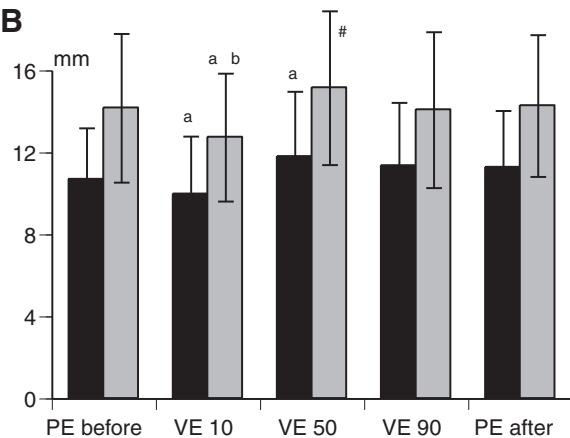

Groups:  TBI  control

Supplement: MOESM3 [file 9604722]
